# Supplementary material
Source: Springer Nature journal article supplement (https://www.springermedizin.de/resource/supplementary/12876_2010_521_MOESM4_ESM.pdf/9436908)

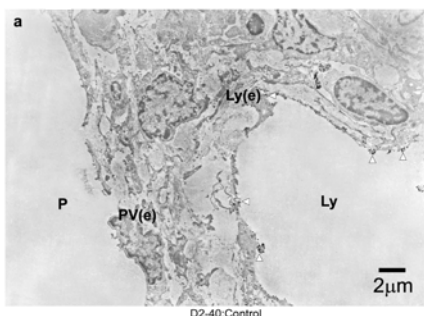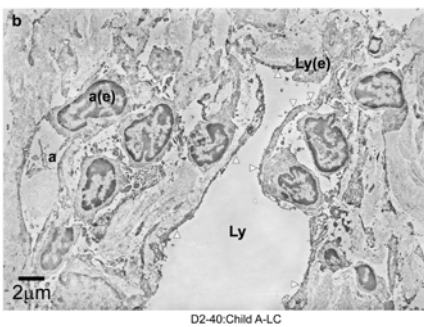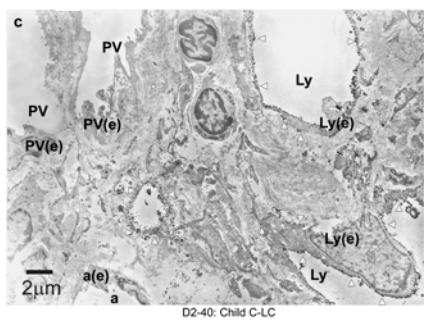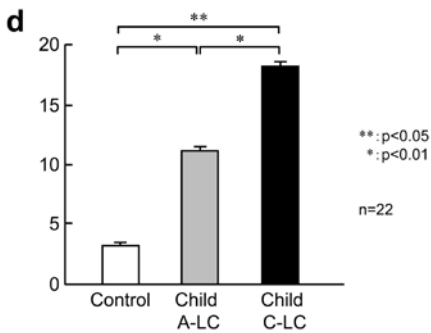

Control:  $3.2 \pm 0.2$  pixel / 2  $\mu$ m

Child A-LC:  $11.2 \pm 0.3$  pixel / 2  $\mu$ m

Child C-LC:  $18.2 \pm 0.4$  pixel / 2  $\mu$ m

Supplement: MOESM4 [file 9436908]
